# Supplementary material for: Effect of Stevioside (Stevia rebaudiana) on Entamoeba histolytica Trophozoites
Source: MDPI journal article supplement (doi:10.3390/pathogens13050373), 2024-04-30
Supplement: s1 [file s1]

**Supplementary material.** Gene amplification condition.

| <b>Gen</b>   | <b>Sequence</b>                                              | <b>Tm<br/>(°C)</b> | <b>Product<br/>(pb)</b> | <b>MgCl<sub>2</sub><br/>(mM)</b> |
|--------------|--------------------------------------------------------------|--------------------|-------------------------|----------------------------------|
| <b>cp1</b>   | F: 5'ACAGCAGTTGAGTCACTCCG 3'<br>R: 5'ACTGCTTTGGGTGCTTGGAT 3' | 55                 | 212                     | 1                                |
| <b>cp2</b>   | F: 5'TGGACCATTGCTGCTATGA 3'<br>R: 5'TAACATGATCCGCATTGTGC 3'  | 52                 | 177                     | 1                                |
| <b>cp5</b>   | F: 5'CGCTGCTATTGATGCTTCTG 3'<br>R: 5'CTCCCCAAATAGTTCCCCAT 3' | 52                 | 173                     | 1.5                              |
| <b>actin</b> | F: 5'GCACTTGTTGTGGATCCTGGA3'<br>R: 5'CTCGAGTTAGAAGCATTTTCT3' | 55                 | 1200                    | 1.5                              |
